# Supplementary material for: Pharmacological Modulation of Human Mesenchymal Stem Cell Chondrogenesis by a Chemically Oversulfated Polysaccharide of Marine Origin: Potential Application to Cartilage Regenerative Medicine
Source: PubMed Central journal article supplement (PMC3443367; doi:10.1002/stem.1686), 2011-11-30

## Supplemental data

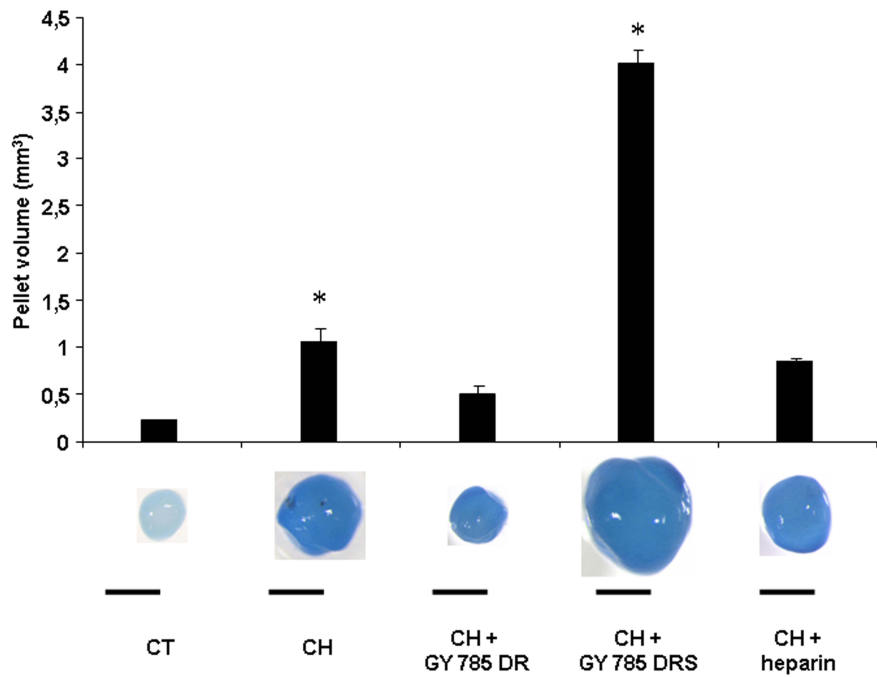

Supplement: stem0030-0471-SD2.pdf [file stem0030-0471-SD2.pdf]
