# Supplementary material for: Pharmacological Modulation of Human Mesenchymal Stem Cell Chondrogenesis by a Chemically Oversulfated Polysaccharide of Marine Origin: Potential Application to Cartilage Regenerative Medicine
Source: PubMed Central journal article supplement (PMC3443367; doi:10.1002/stem.1686), 2011-11-30
Supplement: stem0030-0471-SD4.pdf [file stem0030-0471-SD4.pdf]

| <b>Gene</b>                                               | <b>Gene Bank<br/>Accession<br/>Number</b> | <b>Sequence</b>                                                       | <b>Base<br/>Pairs (bp)</b> |
|-----------------------------------------------------------|-------------------------------------------|-----------------------------------------------------------------------|----------------------------|
| <i>β-ACTIN</i>                                            | NM_001101                                 | Fwd 5'- CCAACCGCGAGAAGATGA -3'<br>Rev 5'- CCAGAGGCGTACAGGGATAG -3'    | 97                         |
| <i>Type II collagen -<br/>α1 chain<br/>(COL2A1)</i>       | NM_001844                                 | Fwd 5'- TGTCAGGGCCAGGATGTC -3'<br>Rev 5'- ATCATTATACCTCTGCCCATCC -3'  | 63                         |
| <i>Aggrecan<br/>(ACAN)</i>                                | NM_001135                                 | Fwd 5'- CCTCCCCTTCACGTGTAAAA -3'<br>Rev 5'- GCTCCGCTTCTGTAGTCTGC -3'  | 64                         |
| <i>Sex determining<br/>region Y-box 9<br/>(SOX9)</i>      | NM_000346                                 | Fwd 5'- GTACCCGCACTTGCACAAC -3'<br>Rev 5'- TCGCTCTCGTTCAGAAGTCTC -3'  | 72                         |
| <i>Cartilage Oligomeric<br/>Matrix Protein<br/>(COMP)</i> | NM_000095                                 | Fwd 5'- GCACCGACGTCAACGAGT -3'<br>Rev 5'- TGGTGTTGATACAGCGGACT -3'    | 63                         |
| <i>Type I collagen -<br/>α1 chain<br/>(COL1A1)</i>        | NM_000088                                 | Fwd 5'- GGGATTCCCTGGACCTAAAG -3'<br>Rev 5'- GGAACACCTCGCTCTCCAG -3'   | 63                         |
| <i>Type X collagen -<br/>α1 chain<br/>(COL10A1)</i>       | NM_000493                                 | Fwd 5'- CACCTTCTGCACTGCTCATC -3'<br>Rev 5'- GGCAGCATATTCTCAGATGGA -3' | 104                        |

Table 1: Sequences of primer pairs, gene bank accession numbers used for real time RT-PCR analysis and size of PCR products.
